# Supplementary material
Source: PubMed Central journal article supplement (PMC6933863)
Supplement: PRO-29-169-s001.pdf [file PRO-29-169-s001.pdf]

Supporting information

**IDDomainSpotter: Compositional bias reveals domains in long disordered protein regions - insights from transcription factors**

Peter S. Millard<sup>1,2</sup>, Katrine Bugge<sup>3</sup>, Riccardo Marabini<sup>3</sup>, Wouter K. Boomsma<sup>4\*</sup>, Meike Burow<sup>1,2</sup>, Birthe B. Kragelund<sup>3\*</sup>

<sup>1</sup>DynaMo Center, Dept. of Plant and Environmental Sciences, University of Copenhagen, Denmark, <sup>2</sup>Copenhagen Plant Science Centre, Dept. of Plant and Environmental Sciences, University of Copenhagen, Denmark. <sup>3</sup>Structural Biology and NMR Laboratory, Dept. of Biology, University of Copenhagen, Denmark. <sup>4</sup>Department of Computer Science, University of Copenhagen, Denmark.

\*Corresponding author (Birthe B. Kragelund, Ole Maaloes Vej 5, DK-2200 Copenhagen N, Denmark, +45 3532 2081, [bbk@bio.ku.dk](mailto:bbk@bio.ku.dk)) (Correspondence may also be addressed to Wouter Boomsma, [wb@di.ku.dk](mailto:wb@di.ku.dk))

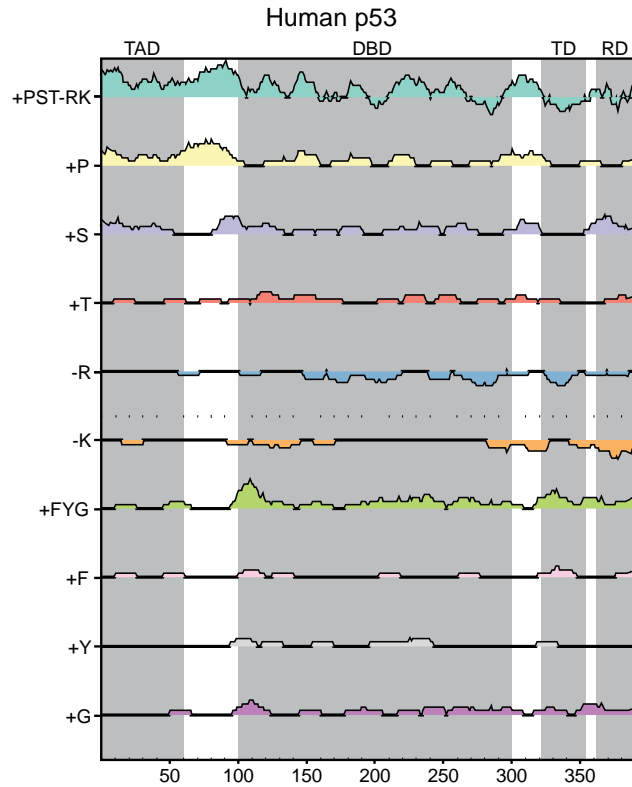

**Supplementary Figure 1.** IDDomainSpotter profiles of human p53. Grey boxes indicate domains, conserved regions and motifs as named above the graph. DBD: DNA-binding domain, TAD: transactivation domain, TD: tetramerization domain, RD: regulatory domain. Profiles display scores for Pro+Ser+Thr-Arg-Lys (+PST-RK), Phe+Tyr+Gly (+FYG) and individual residues, calculated over 15 residues windows.

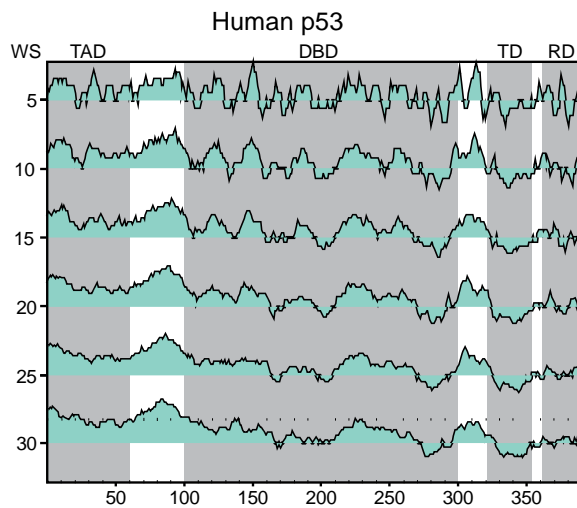

**Supplementary Figure 2.** IDDomainSpotter profiles of human p53. Grey boxes indicate domains, conserved regions and motifs as named above the graph. DBD: DNA-binding domain, TAD: transactivation domain, TD: tetramerization domain, RD: regulatory domain. Profiles display scores for Pro+Ser+Thr-Arg-Lys (+PST-RK), calculated with various window sizes (WS).

**Supplementary table 1.** Sequences used in Mammalia p53 alignment (Figure 1C).

| UniProt identifier | Species                                    | Species common name            |
|--------------------|--------------------------------------------|--------------------------------|
| P41685             | <i>Felis catus</i>                         | Cat                            |
| A0A3Q7Y5W2         | <i>Ursus arctos horribilis</i>             | Grizzly bear                   |
| G1MEP6             | <i>Ailuropoda melanoleuca</i>              | Giant panda                    |
| A0A2U3VT95         | <i>Odobenus rosmarus divergens</i>         | Pacific walrus                 |
| M3YC88             | <i>Mustela putorius furo</i>               | European domestic ferret       |
| A0A3Q7TIN0         | <i>Vulpes vulpes</i>                       | Red fox                        |
| F1PI27             | <i>Canis lupus familiaris</i>              | Dog                            |
| A0A2U3Y5G3         | <i>Leptonychotes weddellii</i>             | Weddell seal                   |
| A0A2Y9L4Q2         | <i>Enhydra lutris kenyon</i>               | Sea otter                      |
| A0A455C1G1         | <i>Physeter macrocephalus</i>              | Sperm whale                    |
| A0A2U4C2U9         | <i>Tursiops truncatus</i>                  | Atlantic bottle-nosed dolphin  |
| A0A340XCN5         | <i>Lipotes vexillifer</i>                  | Yangtze river dolphin          |
| A0A2Y9Q793         | <i>Delphinapterus leucas</i>               | Beluga whale                   |
| A0A383YUA7         | <i>Balaenoptera acutorostrata scammoni</i> | North Pacific minke whale      |
| G3T035             | <i>Loxodonta africana</i>                  | African elephant               |
| A0A2Y9R5B9         | <i>Trichechus manatus latirostris</i>      | Florida manatee                |
| A0A1S2ZRH2         | <i>Erinaceus europaeus</i>                 | Western European hedgehog      |
| C3VC56             | <i>Ovis aries</i>                          | Sheep                          |
| P67939             | <i>Bos taurus</i>                          | Bovine                         |
| A0A3Q2HE67         | <i>Equus caballus</i>                      | Horse                          |
| L7N1B2             | <i>Myotis lucifugus</i>                    | Little brown bat               |
| L5JZ91             | <i>Pteropus alecto</i>                     | Black flying fox               |
| Q9TUB2             | <i>Sus scrofa</i>                          | Pig                            |
| Q95330             | <i>Oryctolagus cuniculus</i>               | Rabbit                         |
| G3WS63             | <i>Sarcophilus harrisii</i>                | Tasmanian devil                |
| A0A158SIS7         | <i>Mus musculus</i>                        | Mouse                          |
| P10361             | <i>Rattus norvegicus</i>                   | Rat                            |
| A0A1S3EYC1         | <i>Dipodomys ordii</i>                     | Ord's kangaroo rat             |
| A0A1U7Q2G4         | <i>Mesocricetus auratus</i>                | Golden hamster                 |
| Q9WUR6             | <i>Cavia porcellus</i>                     | Guinea pig                     |
| I3N5N2             | <i>Ictidomys tridecemlineatus</i>          | Thirteen-lined ground squirrel |
| G5B5D6             | <i>Heterocephalus glaber</i>               | Naked mole rat                 |
| A0A091CJU7         | <i>Fukomys damarensis</i>                  | Damaraland mole rat            |

**Supplementary table 2.** Sequences used in Chordata p53 alignment (Figure 1E).

| UniProt identifier | Species                                 | Species common name            |
|--------------------|-----------------------------------------|--------------------------------|
| C0H8X1             | <i>Salmo salar</i>                      | Atlantic salmon                |
| A0A060XN97         | <i>Oncorhynchus mykiss</i>              | Rainbow trout                  |
| A0A3F2YPG3         | <i>Xiphophorus maculatus</i>            | Southern platyfish             |
| A0A2R8RHX5         | <i>Danio rerio</i>                      | Zebrafish                      |
| W5LNF4             | <i>Astyanax mexicanus</i>               | Blind cave fish                |
| O93379             | <i>Ictalurus punctatus</i>              | Channel catfish                |
| H2U133             | <i>Takifugu rubripes</i>                | Japanese pufferfish            |
| H3CXQ0             | <i>Tetraodon nigroviridis</i>           | Spotted green pufferfish       |
| W5N8V4             | <i>Lepisosteus oculatus</i>             | Spotted gar                    |
| G3PK82             | <i>Gasterosteus aculeatus</i>           | Three-spined stickleback       |
| I3KRX9             | <i>Oreochromis niloticus</i>            | Nile tilapia                   |
| A0A2U9B0Y2         | <i>Scophthalmus maximus</i>             | Turbot                         |
| P10360             | <i>Gallus gallus</i>                    | Chicken                        |
| A0A2I0M383         | <i>Columba livia</i>                    | Rock dove                      |
| A0A493TL36         | <i>Anas platyrhynchos platyrhynchos</i> | Northern mallard               |
| A0A1U7SJ11         | <i>Alligator sinensis</i>               | Chinese alligator              |
| A0A151MW63         | <i>Alligator mississippiensis</i>       | American alligator             |
| F7A9M9             | <i>Xenopus tropicalis</i>               | Western clawed frog            |
| H2ZH75             | <i>Ciona savignyi</i>                   | Pacific transparent sea squirt |
| Q4H300             | <i>Ciona intestinalis</i>               | Transparent sea squirt         |
| H3B1Z4             | <i>Latimeria chalumnae</i>              | Coelacanth                     |
| K7G3P4             | <i>Pelodiscus sinensis</i>              | Chinese softshell turtle       |

**Supplementary table 3.** Sequences used in Mammalia GCR alignment (Figure 1D).

| UniProt identifier | Species                                    | Species common name            |
|--------------------|--------------------------------------------|--------------------------------|
| M3WZ39             | <i>Felis catus</i>                         | Cat                            |
| A0A3Q7W0S9         | <i>Ursus arctos horribilis</i>             | Grizzly bear                   |
| A0A2U3WVZ7         | <i>Odobenus rosmarus divergens</i>         | Pacific walrus                 |
| A0A2Y9KIM9         | <i>Enhydra lutris kenyoni</i>              | Sea otter                      |
| A0A3Q7V3D8         | <i>Vulpes vulpes</i>                       | Red fox                        |
| A0A2U3XTM7         | <i>Leptonychotes weddellii</i>             | Weddell seal                   |
| A0A384C5F8         | <i>Ursus maritimus</i>                     | Polar bear                     |
| A0A452SBP1         | <i>Ursus americanus</i>                    | American black bear            |
| F1Q298             | <i>Canis lupus familiaris</i>              | Dog                            |
| G1LUC3             | <i>Ailuropoda melanoleuca</i>              | Giant panda                    |
| M3Y916             | <i>Mustela putorius furo</i>               | European domestic ferret       |
| A0A2Y9PIT4         | <i>Delphinapterus leucas</i>               | Beluga whale                   |
| A0A2Y9SPF1         | <i>Physeter macrocephalus</i>              | Sperm whale                    |
| A0A384B3U4         | <i>Balaenoptera acutorostrata scammoni</i> | North Pacific minke whale      |
| A0A340Y3E1         | <i>Lipotes vexillifer</i>                  | Yangtze river dolphin          |
| A0A2U4AH03         | <i>Tursiops truncatus</i>                  | Atlantic bottle-nosed dolphin  |
| F1MN19             | <i>Bos taurus</i>                          | Bovine                         |
| A0A452EXA0         | <i>Capra hircus</i>                        | Goat                           |
| W5NVF6             | <i>Ovis aries</i>                          | Sheep                          |
| F1RM35             | <i>Sus scrofa</i>                          | Pig                            |
| A0A2Y9DU07         | <i>Trichechus manatus latirostri</i>       | Florida manatee                |
| A0A1S2ZGL3         | <i>Erinaceus europaeus</i>                 | Western European hedgehog      |
| G1PHX2             | <i>Myotis lucifugus</i>                    | Little brown bat               |
| A0A3Q2HH04         | <i>Equus caballus</i>                      | Horse                          |
| G3SVD4             | <i>Loxodonta africana</i>                  | African elephant               |
| G3VFI8             | <i>Sarcophilus harrisii</i>                | Tasmanian devil                |
| G1T1R4             | <i>Oryctolagus cuniculus</i>               | Rabbit                         |
| F6S9Z9             | <i>Monodelphis domestica</i>               | Gray short-tailed opossum      |
| F6W567             | <i>Ornithorhynchus anatinus</i>            | Duckbill platypus              |
| L9L2B3             | <i>Tupaia chinensis</i>                    | Chinese tree shrew             |
| P06537             | <i>Mus musculus</i>                        | Mouse                          |
| P06536             | <i>Rattus norvegicus</i>                   | Rat                            |
| A0A1U8BLX0         | <i>Mesocricetus auratus</i>                | Golden hamster                 |
| H0V4W0             | <i>Cavia porcellus</i>                     | Guinea pig                     |
| A0A1S3FH64         | <i>Dipodomys ordii</i>                     | Ord's kangaroo rat             |
| A0A287D1I2         | <i>Ictidomys tridecemlineatus</i>          | Thirteen-lined ground squirrel |
| G5AQS2             | <i>Heterocephalus glaber</i>               | Naked mole rat                 |
| G3HEK6             | <i>Cricetulus griseus</i>                  | Chinese hamster                |
| A0A091DN95         | <i>Fukomys damarensis</i>                  | Damaraland mole rat            |

**Supplementary table 4.** Sequences used in Chordata GCR alignment (Figure 1F).

| UniProt identifier | Species                                 | Species common name        |
|--------------------|-----------------------------------------|----------------------------|
| A0A1S3LMP5         | <i>Salmo salar</i>                      | Atlantic salmon            |
| A0A3B4AXU8         | <i>Periophthalmus magnuspinnatus</i>    |                            |
| A0A3P8Z8R7         | <i>Esox lucius</i>                      | Northern pike              |
| A0A3B3QRS8         | <i>Paramormyrops kingsleyae</i>         |                            |
| Q1XHK0             | <i>Danio rerio</i>                      | Zebrafish                  |
| A0A3B5A6Z0         | <i>Stegastes partitus</i>               | Bicolor damselfish         |
| A0A2D0SEE8         | <i>Ictalurus punctatus</i>              | Channel catfish            |
| A0A3B3HHZ3         | <i>Oryzias latipes</i>                  | Japanese rice fish         |
| A0A3B4XM90         | <i>Seriola lalandi dorsalis</i>         | California yellowtail      |
| A0A3B4TRJ1         | <i>Seriola dumerili</i>                 | Greater amberjack          |
| A0A3P9C0Z8         | <i>Maylandia zebra</i>                  | Zebra mbuna                |
| A0A3P8NYX9         | <i>Astatotilapia calliptera</i>         | Eastern happy              |
| A0A3B3YXW0         | <i>Poecilia mexicana</i>                | Atlantic molly             |
| A0A3B4D9J0         | <i>Pygocentrus nattereri</i>            | Red-bellied piranha        |
| A0A3B1IJY8         | <i>Astyanax mexicanus</i>               | Blind cave fish            |
| A0A3B4ET53         | <i>Pundamilia nyererei</i>              |                            |
| A0A2I4BX66         | <i>Austrofundulus limnaeus</i>          |                            |
| A0A060WHU5         | <i>Oncorhynchus mykiss</i>              | Rainbow trout              |
| A0A3B3BLV6         | <i>Oryzias melastigma</i>               | Marine medaka              |
| M4AXU0             | <i>Xiphophorus maculatus</i>            | Southern platyfish         |
| A0A3P8TUC7         | <i>Amphiprion percula</i>               | Orange clownfish           |
| A0A3P8WGG5         | <i>Cynoglossus semilaevis</i>           | Tongue sole                |
| A0A3B3V5Z8         | <i>Poecilia latipinna</i>               | Sailfin molly              |
| H2T175             | <i>Takifugu rubripes</i>                | Japanese pufferfish        |
| I3KN75             | <i>Oreochromis niloticus</i>            | Nile tilapia               |
| A0A087XJA9         | <i>Poecilia formosa</i>                 | Amazon molly               |
| A0A3P9NF67         | <i>Poecilia reticulata</i>              | Guppy                      |
| G3Q2H5             | <i>Gasterosteus aculeatus</i>           | Three-spined stickleback   |
| H3CU66             | <i>Tetraodon nigroviridis</i>           | Spotted green pufferfish   |
| A0A2U9C6P4         | <i>Scophthalmus maximus</i>             | Turbot                     |
| W5MWX4             | <i>Lepisosteus oculatus</i>             | Spotted gar                |
| A0A1D5PRD7         | <i>Gallus gallus</i>                    | Chicken                    |
| A0A493TR65         | <i>Anas platyrhynchos platyrhynchos</i> | Northern mallard           |
| A0A2I0LTB5         | <i>Columba livia</i>                    | Rock dove                  |
| A0A1V4KTY0         | <i>Patagioenas fasciata monilis</i>     |                            |
| H0YPE9             | <i>Taeniopygia guttata</i>              | Zebra finch                |
| A0A3M0J6J1         | <i>Hirundo rustica rustica</i>          | Barn swallow               |
| A0A226MKI6         | <i>Callipepla squamata</i>              | Scaled quail               |
| A0A218UEU6         | <i>Lonchura striata domestica</i>       | Bengalese finch            |
| U3K2U0             | <i>Ficedula albicollis</i>              | Collared flycatcher        |
| G1NAS4             | <i>Meleagris gallopavo</i>              | Wild turkey                |
| A0A0Q3P7Y5         | <i>Amazona aestiva</i>                  | Blue-fronted Amazon parrot |
| A0A091W3R1         | <i>Nipponia nippon</i>                  | Crested ibis               |
| A0A091FM40         | <i>Cuculus canorus</i>                  | Common cuckoo              |
| A0A091IR26         | <i>Calypte anna</i>                     | Anna's hummingbird         |
| A0A087RF69         | <i>Aptenodytes forsteri</i>             | Emperor penguin            |
| A0A091F184         | <i>Corvus brachyrhynchos</i>            | American crow              |
| A0A099ZXG0         | <i>Charadrius vociferus</i>             | Killdeer                   |
| A0A099YVI9         | <i>Tinamus guttatus</i>                 | White-throated tinamou     |
| A0A093GET9         | <i>Dryobates pubescens</i>              | Downy woodpecker           |
| A0A091IP29         | <i>Egretta garzetta</i>                 | Little egret               |
| A0A091W088         | <i>Opisthocomus hoazin</i>              | Hoatzin                    |
| A0A093PLE0         | <i>Manacus vitellinus</i>               | Golden-collared manakin    |

|            |                                   |                           |
|------------|-----------------------------------|---------------------------|
| A0A093H389 | <i>Struthio camelus australis</i> | South African ostrich     |
| A0A452HUM1 | <i>Gopherus agassizii</i>         | Agassiz's desert tortoise |
| K7GAE8     | <i>Pelodiscus sinensis</i>        | Chinese softshell turtle  |
| A0A3Q0GJF3 | <i>Alligator sinensis</i>         | Chinese alligator         |
| A0A151M6S0 | <i>Alligator mississippiensis</i> | American alligator        |
| Q6DDL0     | <i>Xenopus laevis</i>             | African clawed frog       |
| F6XE59     | <i>Xenopus tropicalis</i>         | Western clawed frog       |
| G1KP59     | <i>Anolis carolinensis</i>        | Green anole               |
| A0A401T225 | <i>Chiloscyllium punctatum</i>    | Brownbanded bambooshark   |
| A0A401P986 | <i>Scyliorhinus torazame</i>      | Cloudy catshark           |
| H3B6W7     | <i>Latimeria chalumnae</i>        | Coelacanth                |



**Supplementary table 5.** Sequences used in Brassicales NAC46 alignment (Figure 2C).

| UniProt identifier | Species                                | Species common name   |
|--------------------|----------------------------------------|-----------------------|
| A0A078IN86         | <i>Brassica napus</i>                  | Rape                  |
| A0A0D3AFP5         | <i>Brassica oleracea var. oleracea</i> | Wild cabbage          |
| M4ET20             | <i>Brassica rapa subsp. pekinensis</i> | Chinese cabbage       |
| R0G5Z5             | <i>Capsella rubella</i>                | Pink shepherd's-purse |
| V4LGP0             | <i>Eutrema salsugineum</i>             | Saltwater cress       |

**Supplementary table 6.** Sequences used in Brassicales NAC13 alignment (Figure 2D).

| UniProt identifier | Species                                | Species common name   |
|--------------------|----------------------------------------|-----------------------|
| A0A078FDS7         | <i>Brassica napus</i>                  | Rape                  |
| A0A0D3D7A3         | <i>Brassica oleracea var. oleracea</i> | Wild cabbage          |
| M4D782             | <i>Brassica rapa subsp. pekinensis</i> | Chinese cabbage       |
| R0IN97             | <i>Capsella rubella</i>                | Pink shepherd's-purse |
| V4MRY1             | <i>Eutrema salsugineum</i>             | Saltwater cress       |

**Supplementary table 7.** Sequences used in Brassicales MYB28/MYB29-like alignment (Figure 3C).

| UniProt identifier | Species                                | Species common name   |
|--------------------|----------------------------------------|-----------------------|
| A0A0D3DDK8         | <i>Brassica oleracea var. oleracea</i> | Wild cabbage          |
| A0A078JG35         | <i>Brassica napus</i>                  | Rape                  |
| M4D901             | <i>Brassica rapa subsp. pekinensis</i> | Chinese cabbage       |
| R0GD41             | <i>Capsella rubella</i>                | Pink shepherd's-purse |
| V4KWQ2             | <i>Eutrema salsugineum</i>             | Saltwater cress       |
| A0A0D3EH73         | <i>Brassica oleracea var. oleracea</i> | Wild cabbage          |
| C5HYG2             | <i>Brassica rapa subsp. pekinensis</i> | Chinese cabbage       |
| R0GVT9             | <i>Capsella rubella</i>                | Pink shepherd's-purse |
| V4LLL3             | <i>Eutrema salsugineum</i>             | Saltwater cress       |
